# Supplementary material for: Determination of meningioma brain tumour grades using Raman microspectroscopy imaging
Source: Royal Society of Chemistry journal article supplement (doi:10.1039/c9an01551e), 2019-01-01

**Electronic Supplementary Information**

**Determination of meningioma brain tumour grades using Raman microspectroscopy  
imaging**

Camilo L. M. Morais,<sup>\*a</sup> Taha Lilo,<sup>a,b</sup> Katherine M. Ashton,<sup>c</sup> Charles Davis,<sup>a</sup> Timothy P.  
Dawson,<sup>c</sup> Nihal Gurusinghe<sup>b</sup> and Francis L. Martin<sup>\*a</sup>

<sup>a</sup>*School of Pharmacy and Biomedical Sciences, University of Central Lancashire, Preston  
PR1 2HE, United Kingdom.*

<sup>b</sup>*Neurosurgery, Royal Preston Hospital, Lancashire Teaching Hospitals NHS Trust, Preston  
PR2 9HT, United Kingdom.*

<sup>c</sup>*Neuropathology, Royal Preston Hospital, Lancashire Teaching Hospitals NHS Trust,  
Preston PR2 9HT, United Kingdom.*

[\\*cdlmedeiros-de-morai@uclan.ac.uk](mailto:cdlmedeiros-de-morai@uclan.ac.uk) / [flmartin@uclan.ac.uk](mailto:flmartin@uclan.ac.uk)

**Table S1:** Correct classification rate for distinguishing Grade I and Grade II meningiomas.

| <b>Algorithm</b> | <b>Class</b> | <b>Training</b> | <b>Test</b> |
|------------------|--------------|-----------------|-------------|
| PCA-LDA          | Grade I      | 80.0            | 31.6        |
|                  | Grade II     | 66.7            | 85.7        |
| PCA-QDA          | Grade I      | 97.8            | 100         |
|                  | Grade II     | 73.3            | 85.7        |
| PCA-SVM          | Grade I      | 100             | 73.7        |
|                  | Grade II     | 100             | 28.6        |
| SPA-LDA          | Grade I      | 75.6            | 42.1        |
|                  | Grade II     | 66.7            | 100         |
| SPA-QDA          | Grade I      | 95.6            | 100         |
|                  | Grade II     | 46.7            | 85.7        |
| SPA-SVM          | Grade I      | 77.8            | 21.1        |
|                  | Grade II     | 100             | 71.4        |
| GA-LDA           | Grade I      | 100             | 63.2        |
|                  | Grade II     | 93.3            | 57.1        |
| GA-QDA           | Grade I      | 100             | 100         |
|                  | Grade II     | 86.7            | 0           |
| GA-SVM           | Grade I      | 91.1            | 42.1        |
|                  | Grade II     | 100             | 42.9        |

**Figure S1:** Outliers identified by a Hotelling  $T^2$  versus Q residuals test (PCA with 8 PCs). (a) Meningioma Grade I samples (outliers: 58, 66); (b) meningioma Grade II samples (outliers: 11, 18); (c) meningioma Grade I outlier spectra in red; (d) meningioma Grade II outlier spectra in red.

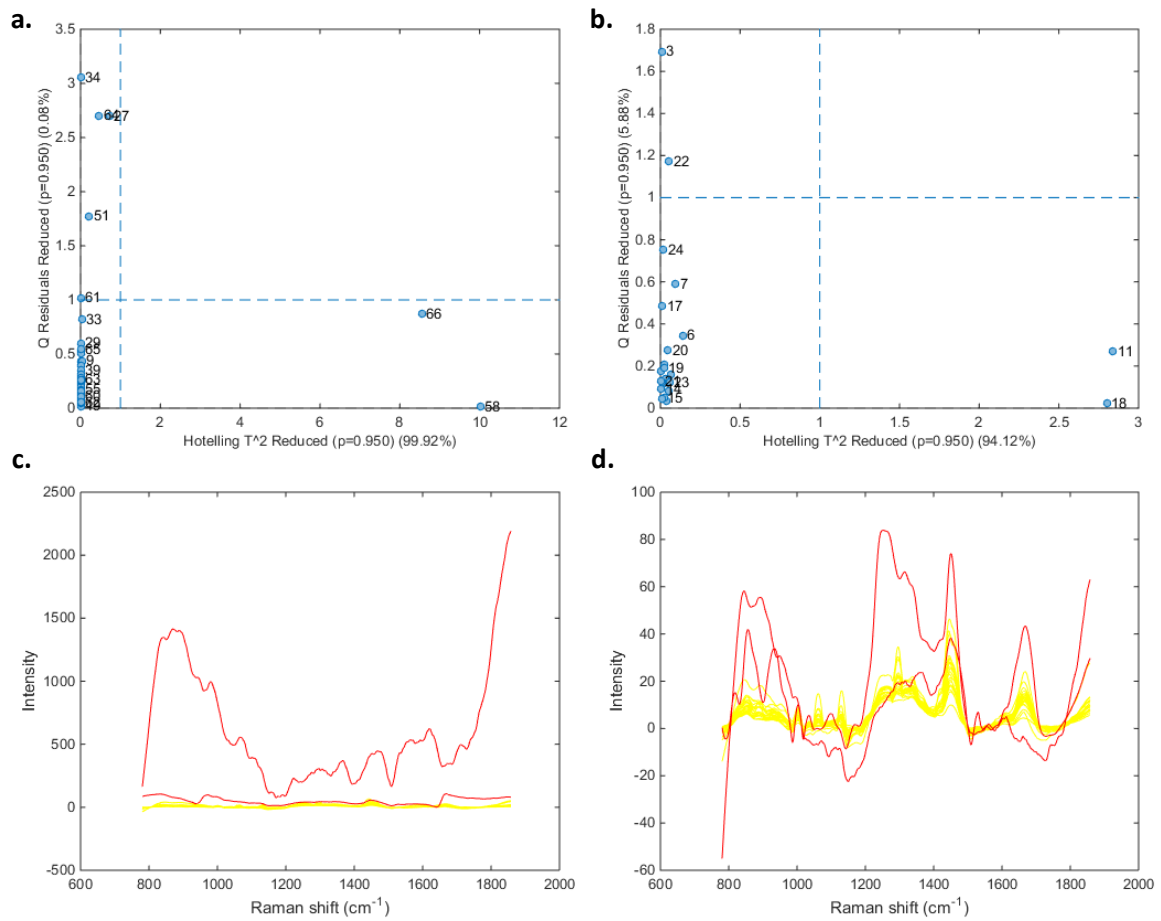

**Figure S2:** Singular value varying the number of principal components (PCs) of PCA.

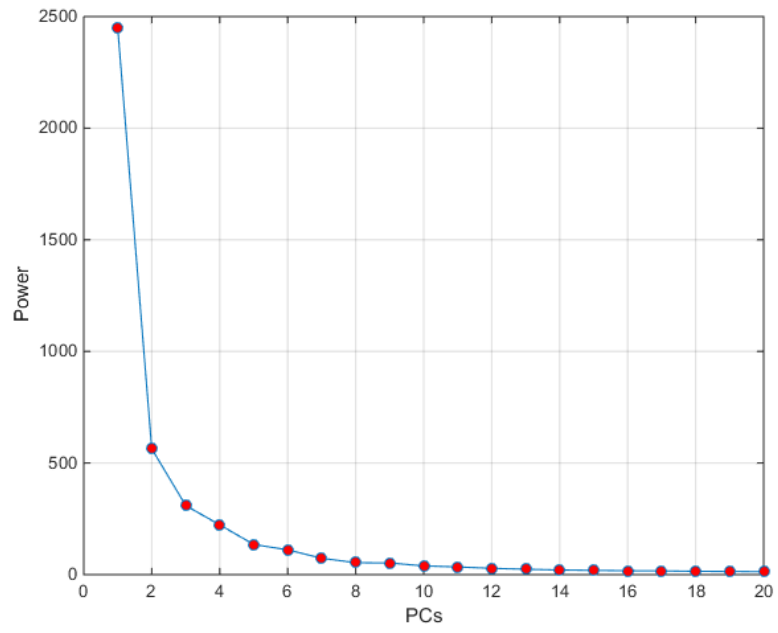

**Figure S3:** Concentration distribution maps and recovered spectral profiles by MCR-ALS for the 1<sup>st</sup> (a), 2<sup>nd</sup> (b), 3<sup>rd</sup> (c), and 4<sup>th</sup> (d) components. Colour bar: relative concentration.

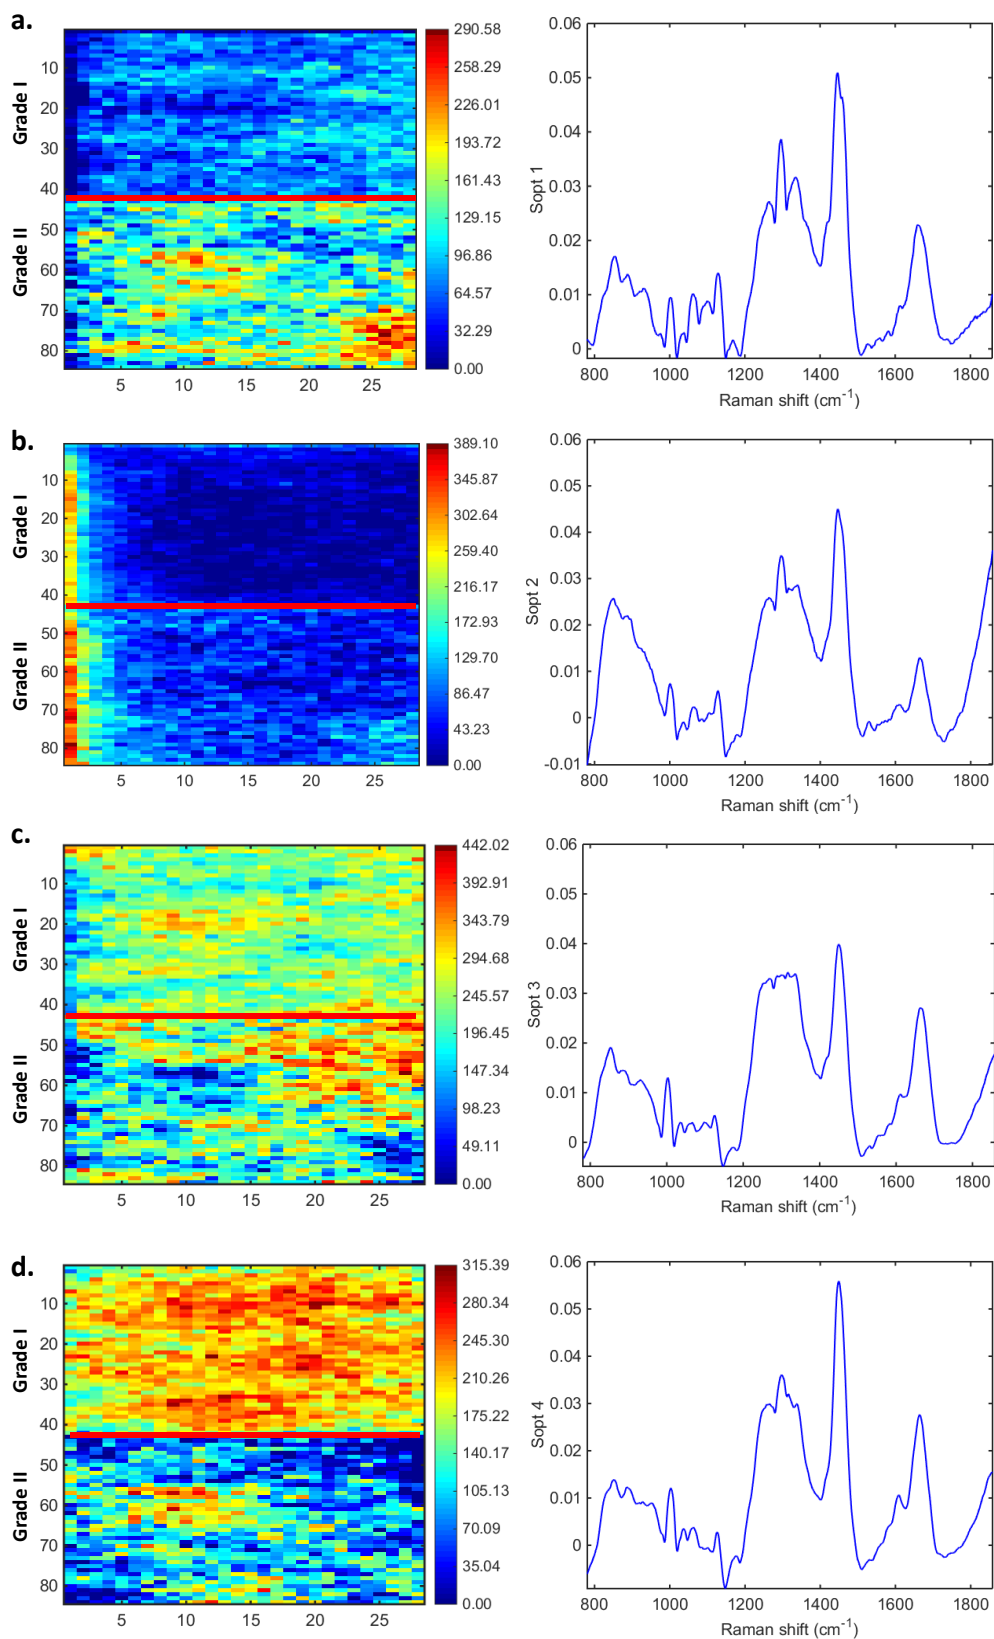

Supplement: c9an01551e1.pdf [file c9an01551e1.pdf]
